# Supplementary material
Source: publisher site journal article supplement (https://www.spandidos-publications.com/7798/downloadSupplementary)

Figure S1. Effect of SPD at various concentrations on LPS-induced acute lung injury. H&E staining of lung tissue sections showing that SPD (10 mg/kg twice daily) pretreatment alleviated LPS-induced lung injury. Scale bars, 100  $\mu$ m. SPD, spermidine; LPS, lipopolysaccharide; H&E, hematoxylin & eosin; Ctrl, control.

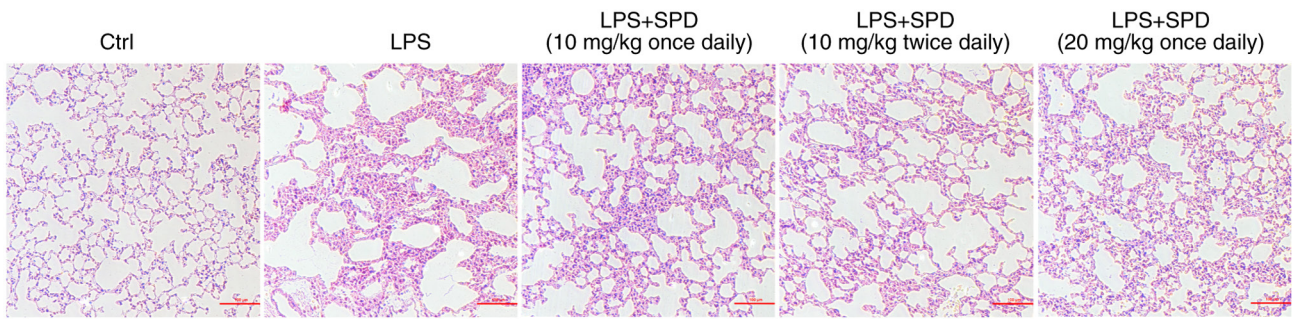

Figure S2. Protective effect of SPD concentration pretreatment on LPS/NIG-induced pyroptosis. (A) PMVECs were treated with LPS (1  $\mu\text{g}/\text{ml}$ ) for 4 h, followed by incubation with different concentrations of NIG (5, 10, 20, 30 and 40  $\mu\text{M}$ ). Cell viability was measured using the CCK-8 assay 1 h following the addition of NIG. \* $P < 0.05$ , the NIG (20  $\mu\text{M}$ ) group vs. the NIG (0  $\mu\text{M}$ ) group. (B) Pulmonary vascular endothelial cells were pretreated with different concentrations of SPD (20, 40, 60, 80, 100 and 200  $\mu\text{M}$ ), followed by sequential treatment with LPS and NIG. Cell viability was assessed using the CCK-8 assay 1 h after the final treatment. \* $P < 0.05$ , the SPD (40  $\mu\text{M}$ ) group vs. the SPD (0  $\mu\text{M}$ ) group. LPS, lipopolysaccharide; NIG, nigericin; PMVECs, pulmonary microvascular endothelial cells; CCK-8, Cell Counting Kit-8; SPD, spermidine.

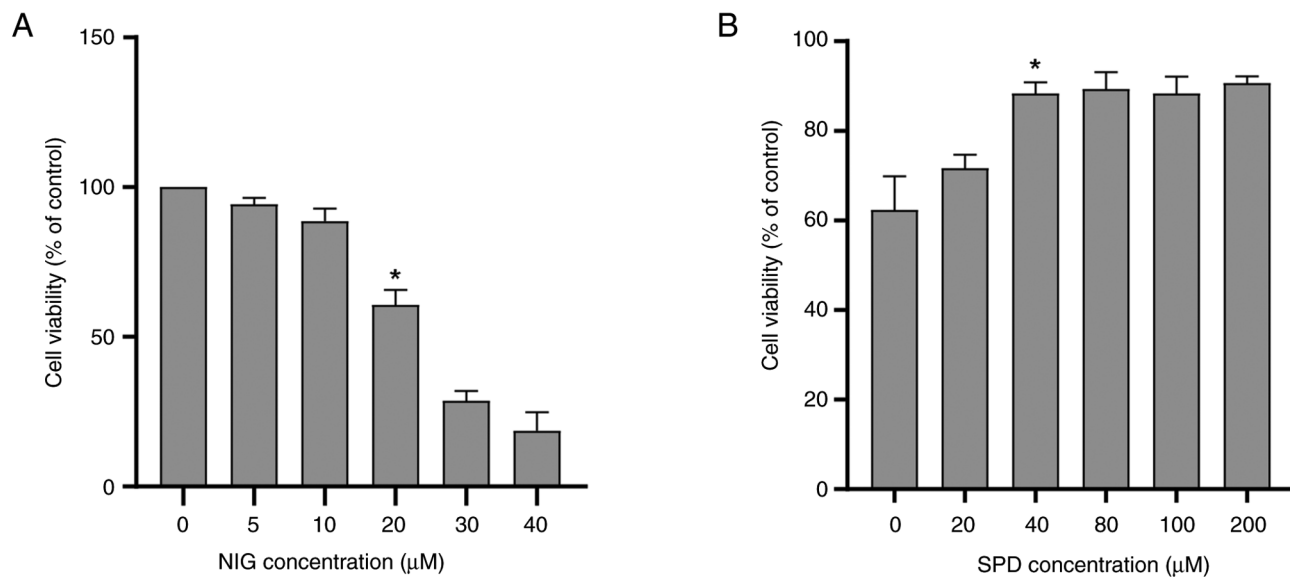

Supplement: Supplementary file 1 [file downloadSupplementary]
